# Supplementary material for: Genetic algorithm parallel optimization of a new high mass resolution planar electrostatic ion trap mass analyzer
Source: Royal Society of Chemistry journal article supplement (doi:10.1039/d2an01568d), 2022-01-01
Supplement: d2an01568d1.pdf [file d2an01568d1.pdf]

## Supporting Information

### **Genetic Algorithm Parallel Optimization of a New High Mass Resolution Planar Electrostatic Ion Trap Mass Analyzer**

Weimin Wang<sup>1,2</sup>, Fuxing Xu<sup>1,2</sup>\*, Fangling Wu<sup>1,2</sup>, Huanmin Wu<sup>2</sup>, Chuan-Fan Ding<sup>1,2</sup>, Li Ding<sup>1,2</sup>\*

<sup>1</sup> *School of Material Science and Chemical Engineering, Ningbo University, Ningbo, 315211, China*

<sup>2</sup> *Key Laboratory of Advanced Mass spectrometry and Molecular Analysis of Zhejiang Province, Institute of Mass spectrometry, Ningbo University, Ningbo, 315211, China*

\*Corresponding Author

E-mail: [dingli1@nbu.edu.cn](mailto:dingli1@nbu.edu.cn); [xufuxing@nbu.edu.cn](mailto:xufuxing@nbu.edu.cn)

Tel & Fax: +86-0574-87605710

**Paper type: Paper**

**Schematic View of angularly-precessing ion motion.** Figure-S1a shows the voltage distribution and simulative ion trajectory in the PEIT-7 mass analyzer on the x-y plane in 0.29 ms. In Figure S-1b, the red line indicates the ion trajectory on the x-z plane, which is also one axial drift of the ion. Due to the symmetrical electrode structure, the ion also has a periodic oscillatory motion in the x-z plane (parallel to point focus).

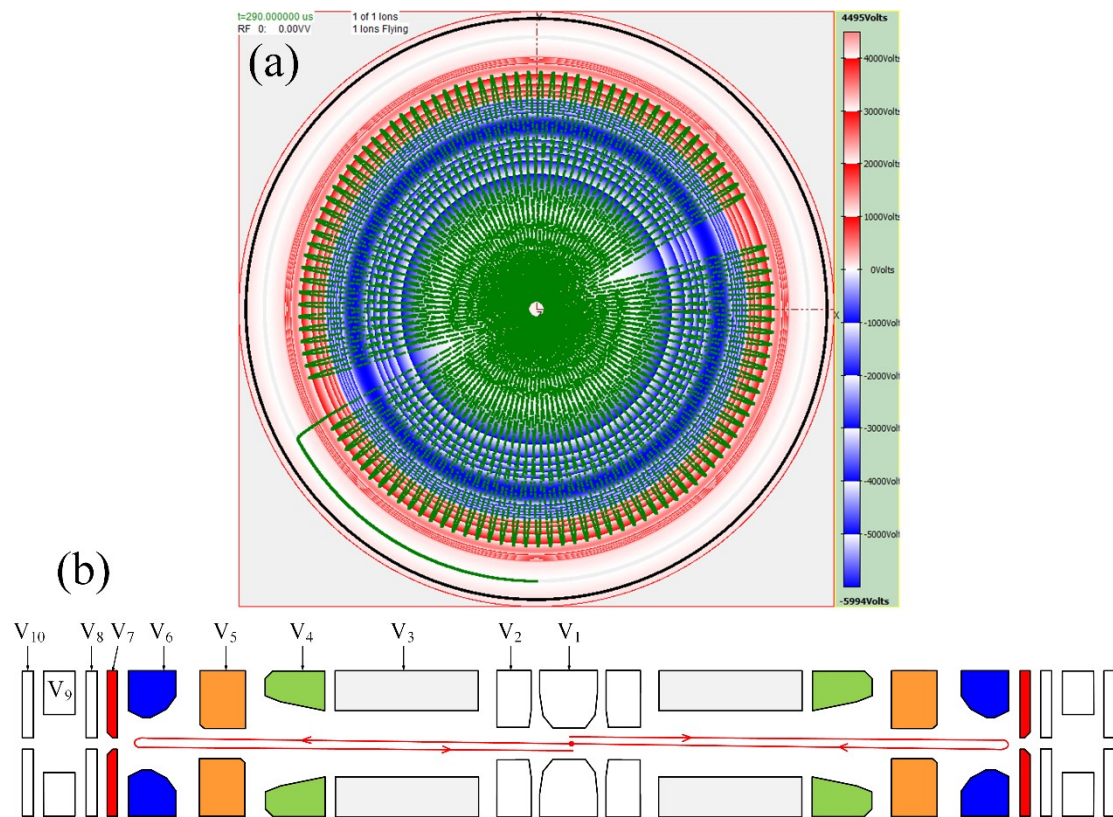

**Figure S-1** (a) Simulative ion motion trajectory in the x-y plane within 0.29 ms and voltage distribution (b) Projection of the 3D ion motion trajectory schematic view on the x-z plane, showing the trajectory from parallel to point and then from point to parallel symmetrically.

**Genetic Algorithm.** A schematic diagram of the operation of GA is shown in the fig. S-2. First, the population is initialized with  $m$  number of random set of voltages (chromosomes), which are composed of genes. Then, each chromosome is evaluated according to the fitness function. The best fit chromosomes are selected into the new population. The selected chromosomes are reproduced by reproduction, cross-over and mutation. Thereafter, the new population is exposed to new iteration. The GA stops when the maximum number of generations or termination conditions is reached. Three GA operators, namely reproduction, cross-over, and mutation, are used in the computational code to create the next generation of chromosomes. Reproduction is

operated based on the fitness of the members so that only the most fit members are selected into the mating pool. The cross-over operator selects any two members from the mating pool and randomly exchanges some portion of the genetic codes to create two new offspring. The mutation operator alters one or more genes of the new offspring with a probability equal to the random mutation rate.

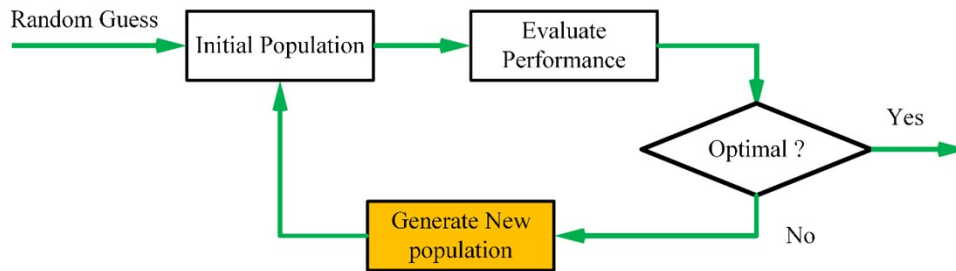

Systematic search:

- GA Operators:
- 1) Reproduction
  - 2) Crossover
 

|          |   |          |
|----------|---|----------|
| 11111111 | X | 11110000 |
| 00000000 |   | 00001111 |
  - 3) Mutation
 

|          |   |          |
|----------|---|----------|
| 10101011 | → | 10101111 |
|----------|---|----------|

**Figure S-2.** Schematic diagram of GA operation

**Table S1.**  $V_n$  optimization process with GAPO method for  $HTD_{max}^p$  reduction

| Iterations   | Population       | Chromosome |         |         |         | $HTD_{max}^p$ (ns) |
|--------------|------------------|------------|---------|---------|---------|--------------------|
|              |                  | $V_4^a$    | $V_5^b$ | $V_6^c$ | $V_7^d$ |                    |
|              | Individual No. 1 | -1179      | -4340   | 4608    | 5712    | 0.26               |
|              | Individual No. 2 | -1290      | -4923   | 4088    | 5094    | 0.36               |
| Generation 1 | ...              |            | ...     |         |         | ...                |
|              | Individual. m-1  | -386       | -5911   | 4355    | 4545    | 0.22               |
|              | Individual. m    | -521       | -5904   | 4331    | 4522    | 0.15               |
| ...          | ...              |            | ...     |         |         | ...                |
|              | Individual. 1    | -852       | -5949   | 3590    | 4513    | 0.009              |
|              | Individual. 2    | -973       | -6115   | 3540    | 4448    | 0.008              |
| Generation n | ...              |            | ...     |         |         | ...                |
|              | Individual. m-1  | -765       | -5856   | 3518    | 4418    | 0.005              |
|              | Individual. m    | -710       | -5859   | 3510    | 4406    | 0.005              |

a: operating voltage ranges is 500~1500 V

b: operating voltage ranges is -4000~-7000 V

c: operating voltage ranges is 3000~6000 V

d: operating voltage ranges is 2500~5500 V

p: 1~m

## Simulation Platform

In figure S-3b, it can be noticed that at the beginning, ion from starting point travels around CIG until the time of pulse injection. The ion injected from any part of CIG rapidly form a disc-shaped ion cloud that occupies the whole middle plane of mass analyzer.

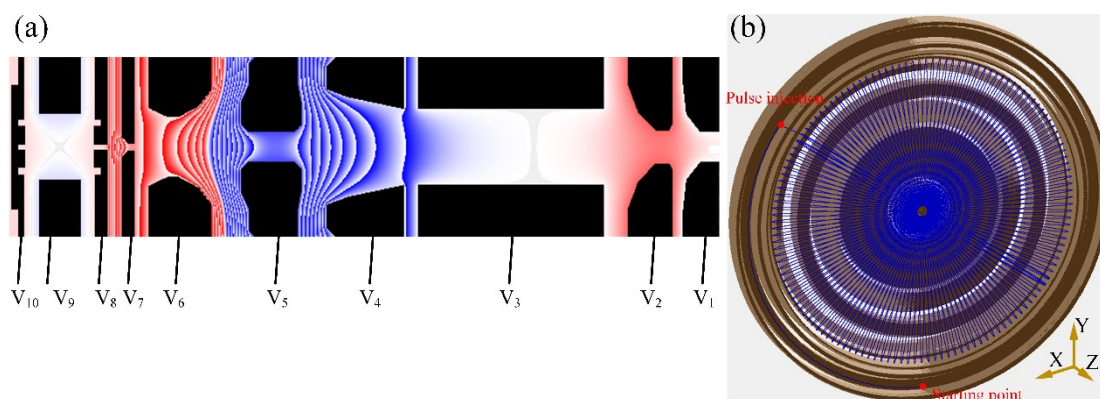

**Figure S-3.** (a) Potential distribution over the quarter cross-section of the PEIT-7 mass analyzer (b) Simulative ion trajectory (blue line) in the PEIT-7 mass analyzer

### GAPO optimization ion trajectory and results

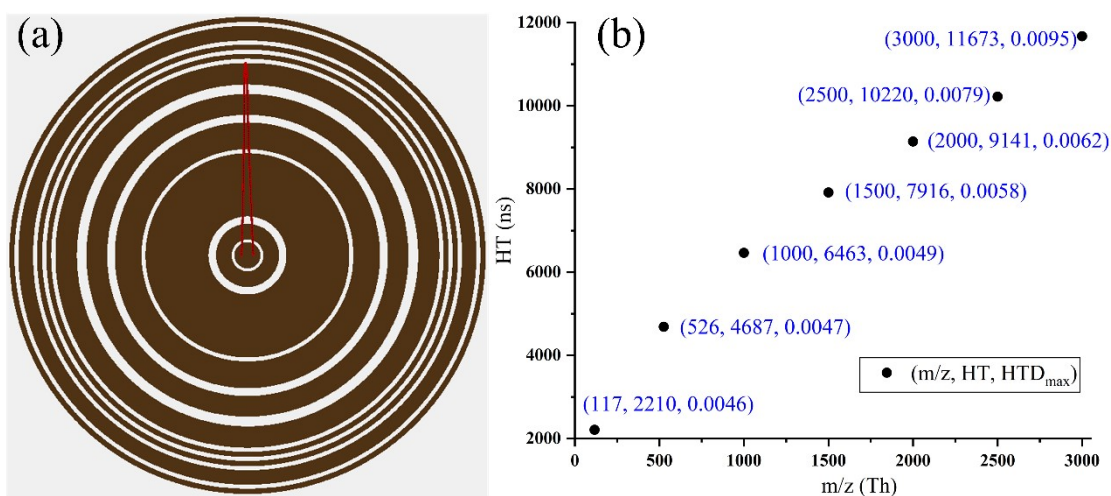

**Figure S-4.** (a) Half-turn ion trajectory in the x-y plane (b) Profiles of (HT, HTD<sub>max</sub>) as a function for different m/z ion

### Mean fitness of the ions for different m/z over the iterations

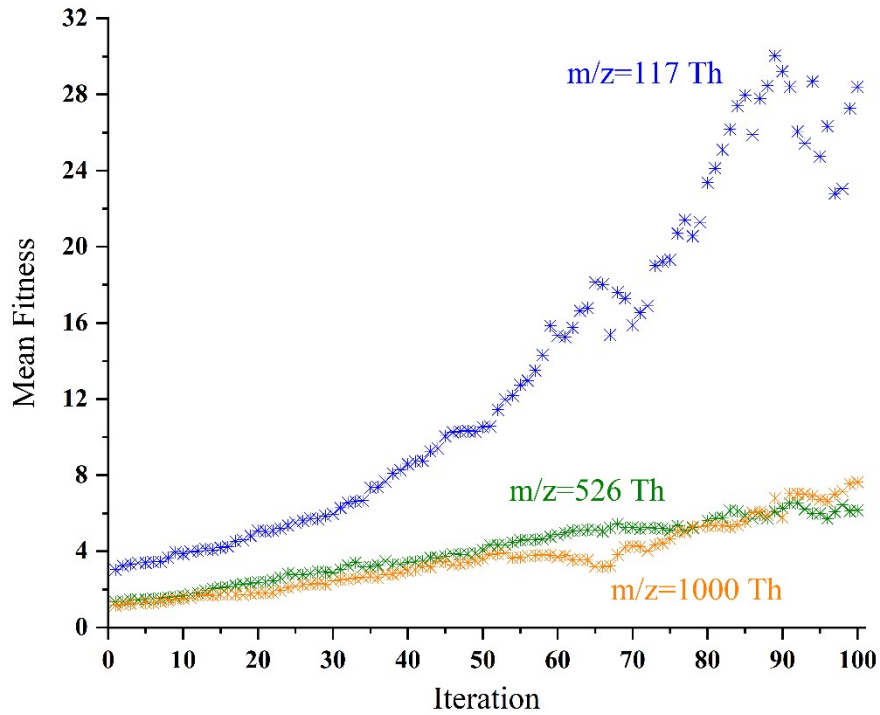

Figure S-5. Mean fitness of the ions for different  $m/z$  over the iterations

**$V_n$  optimization with GAPO method to reduce  $HZ_{max}$**

Finally, based on the minimum  $HZ_{max}$ , the chromosome generated at the (100 th iteration, 15 th individual, 17.03 nm) was selected as the optimal chromosome.

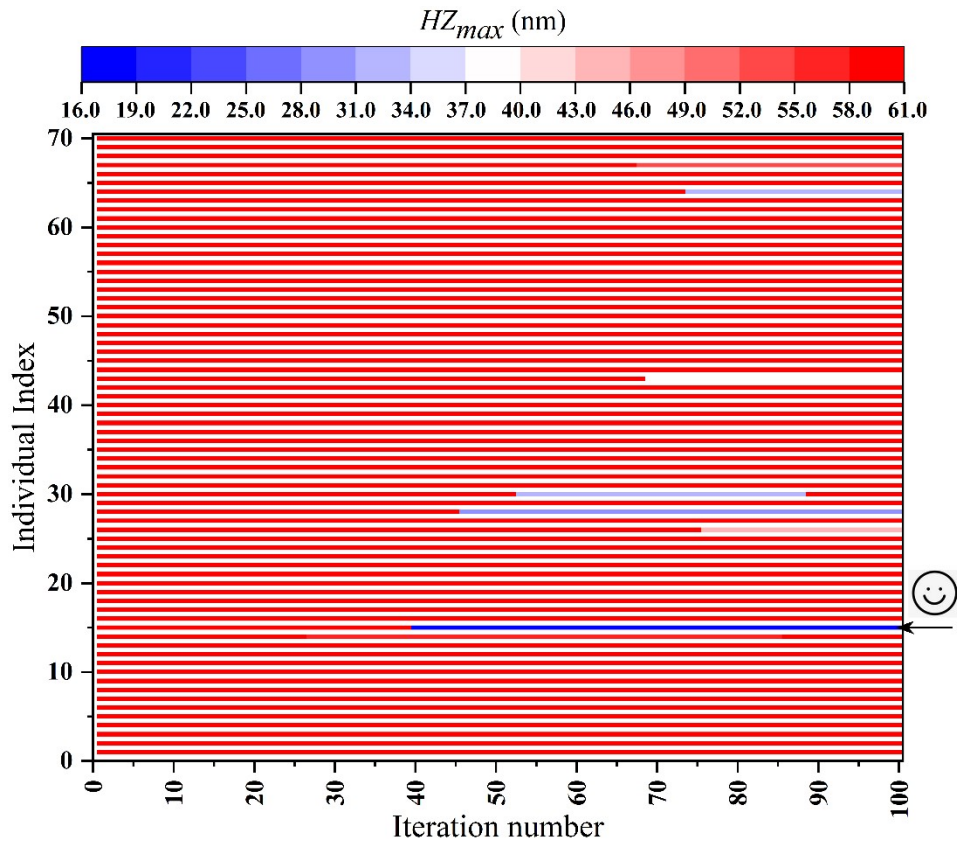

Figure S-6. Contour plot of  $V_n$  optimization process for  $HZ_{max}$  reduction

**Pareto Frontier Points Table**

**Table S2.** The  $V_n$  and the obtained  $HTD_{max}$  and  $HZ_{max}$  with GAPO method

| Points          | $HTD_{max}$ | $HZ_{max}$ | V4         | V5         | V6          | V7          |
|-----------------|-------------|------------|------------|------------|-------------|-------------|
| 1               | 0.06049     | 0.0889     | 3274.02073 | 4183.62594 | -5807.10824 | -986.82178  |
| 2               | 0.00679     | 0.17002    | 3508.48317 | 4410.44112 | -5793.06832 | -895.03516  |
| 3               | 0.10082     | 0.10006    | 3453.836   | 4364.699   | -5875.23    | -1061.88    |
| 4               | 0.00868     | 0.43176    | 3537.59658 | 4448.08745 | -5845.72354 | -904.4052   |
| 5 <sup>B</sup>  | 0.04345     | 0.08137    | 3545.80541 | 4466.96053 | -5913.92718 | -939.06309  |
| 6               | 0.05295     | 0.082      | 3400.41568 | 4293.687   | -5763.90608 | -1005.38607 |
| 7 <sup>C</sup>  | 0.00744     | 0.09831    | 3527.96288 | 4436.30871 | -5846.47683 | -937.28815  |
| 8               | 0.09297     | 0.10999    | 3449.45244 | 4354.65705 | -5797.66103 | -910.46304  |
| 9               | 0.08049     | 0.08781    | 3551.374   | 4478.573   | -5905.92    | -843.294    |
| 10              | 0.00671     | 0.14816    | 3497.56801 | 4397.13965 | -5770.54017 | -872.46818  |
| 11              | 0.11769     | 0.10182    | 3543.065   | 4435.152   | -5764.5     | -894.198    |
| 12              | 0.00626     | 0.15525    | 3508.10925 | 4409.23958 | -5785.23003 | -881.37266  |
| 13              | 0.03413     | 0.1085     | 3540.46187 | 4446.21458 | -5831.77995 | -912.4277   |
| 14              | 0.08691     | 0.10786    | 3546.05642 | 4444.06985 | -5809.66183 | -944.5356   |
| 15              | 0.02273     | 0.10519    | 3533.0398  | 4439.34964 | -5830.8203  | -910.59604  |
| 16              | 0.11253     | 0.09908    | 3557.77565 | 4453.3296  | -5779.47551 | -874.57526  |
| 17              | 0.0988      | 0.09477    | 3553.6104  | 4452.33858 | -5795.9671  | -881.52393  |
| 18              | 0.00774     | 0.11187    | 3492.80962 | 4392.25853 | -5793.22782 | -939.90754  |
| 19              | 0.01571     | 0.09855    | 3515.11641 | 4422.34685 | -5831.99026 | -922.15519  |
| 20              | 0.00784     | 0.26       | 3510.36117 | 4414.34019 | -5810.34853 | -914.6527   |
| 21 <sup>A</sup> | 0.00614     | 0.13757    | 3529.93715 | 4436.72206 | -5813.46056 | -866.81464  |
| 22              | 0.06595     | 0.09174    | 3552.39096 | 4456.1419  | -5822.48982 | -894.07774  |
| 23              | 0.08223     | 0.10074    | 3539.67085 | 4437.57538 | -5815.45626 | -970.94429  |
| 24              | 0.03916     | 0.09663    | 3539.67339 | 4446.01536 | -5854.69009 | -968.34711  |
| 25              | 0.07437     | 0.09421    | 3544.8953  | 4445.26258 | -5795.99703 | -872.68352  |
| 26              | 0.05593     | 0.08753    | 3482.91226 | 4389.32793 | -5828.20391 | -957.81353  |
| 27              | 0.05061     | 0.08753    | 3511.99915 | 4422.60022 | -5827.72397 | -877.15929  |
| 28              | 0.02696     | 0.1237     | 3559.1313  | 4473.84289 | -5881.24276 | -909.23621  |
| 29              | 0.04811     | 0.08573    | 3533.59323 | 4437.19934 | -5840.1967  | -971.39944  |
| 30              | 0.06049     | 0.0889     | 3274.02073 | 4183.62594 | -5807.10824 | -986.82178  |

**Iso-coordinate property for  $z_0$  spread and kinetic energy and x position as function of  $E_t$**

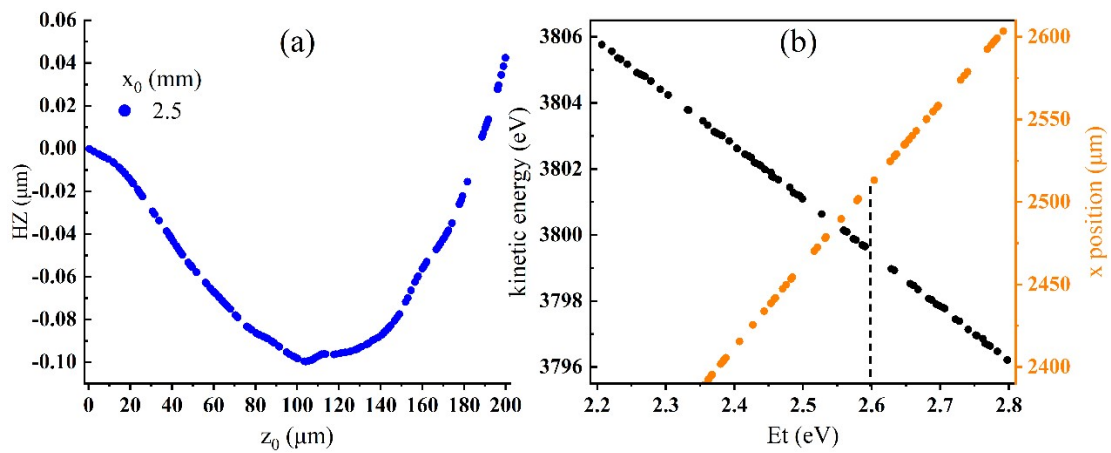

**Figure S-7.** (a)  $HZ$  plot at  $x_0=2.50$  mm (b) kinetic energy and x position on the first perihelion as function of  $E_t$



**Simulated mass spectra for six groups of ions separated by 0.0005 Th ( $m/z = 117.0000$  Th to  $117.0025$  Th)**

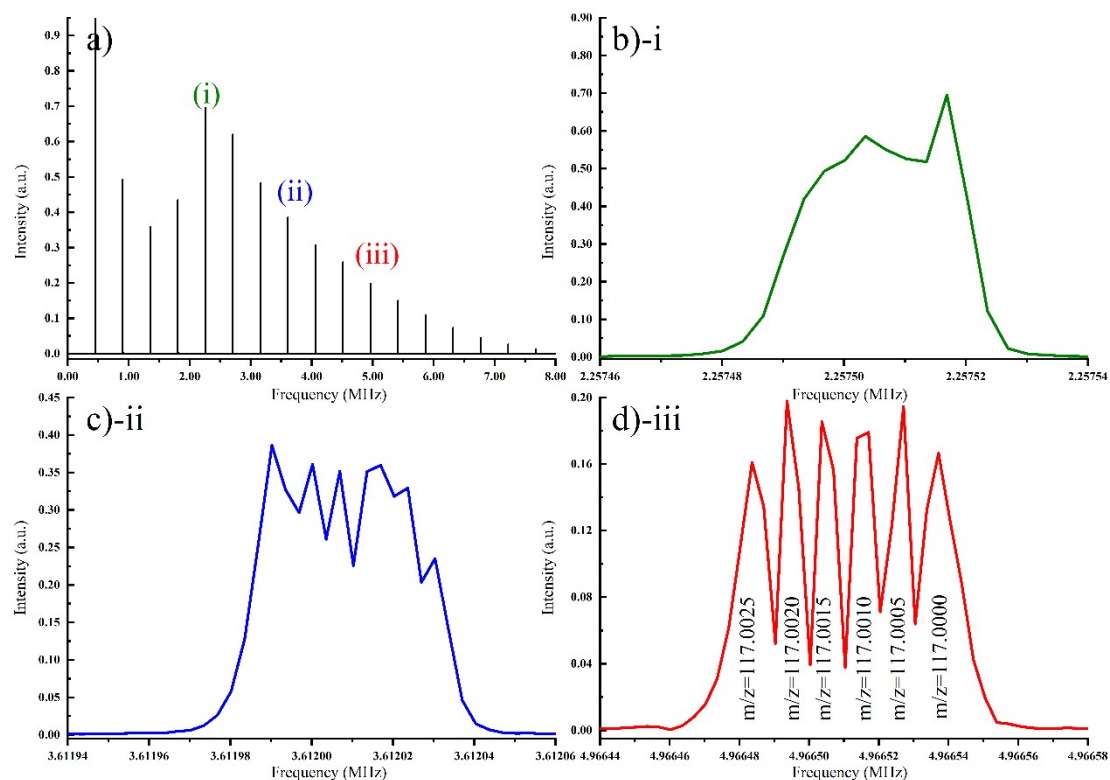

**Figure S-8.** (a) Simulated mass spectra after FFT with 200 ms from frequency 1~8 MHz, (b) Enlarged mass spectra from frequency 2.25746~2.25754 MHz (c) Enlarged mass spectra from frequency 3.61194~3.61206 MHz (d) Enlarged mass spectra from frequency 4.96644~4.96638 MHz
